# Supplementary material for: Towards High Performance: Solution-Processed Perovskite Solar Cells with Cu-Doped CH3NH3PbI3
Source: MDPI journal article supplement (doi:10.3390/nano14020172), 2024-01-12
Supplement: s1 [file s1]

## Towards High-Performance: Solution-Processed Perovskite Solar Cells with Cu-Doped $\text{CH}_3\text{NH}_3\text{PbI}_3$

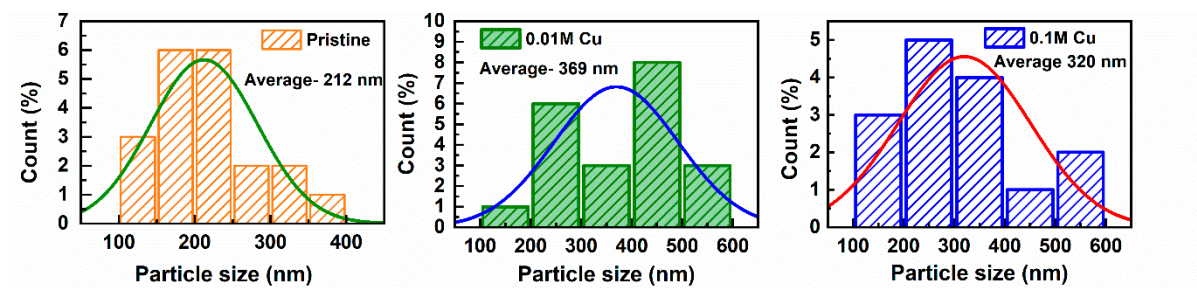

**Figure S1.** The histogram distribution of average grains of pristine perovskite and 0.01M and 0.1M Cu doped samples

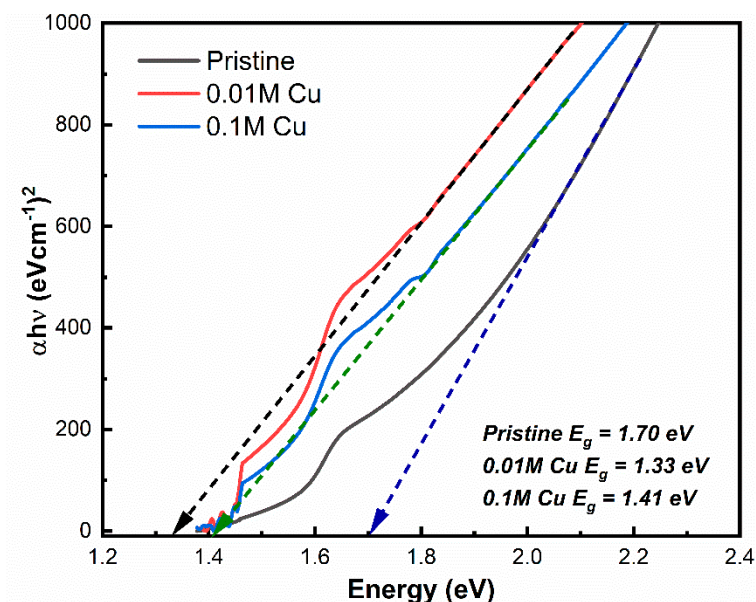

**Figure S2.** Band gap energy ( $E_g$ ) determination from the Tauc plot.
